# Supplementary material for: Compositional Constraint Is the Key Force in Shaping Codon Usage Bias in Hemagglutinin Gene in H1N1 Subtype of InfluenzaAVirus
Source: Hindawi journal article supplement (doi:10.1155/2014/349139), 2014-01-01
Supplement: f1 [file 349139.f1.pdf]

## Supplementary table 1.

### Information of the coding sequences of hemagglutinin (HA) genes used in the study

| SI No | Accession No | Length |
|-------|--------------|--------|
| 1     | KF280655     | 1701   |
| 2     | KF280663     | 1701   |
| 3     | KF280671     | 1701   |
| 4     | KF280679     | 1701   |
| 5     | KF280687     | 1701   |
| 6     | KF280695     | 1701   |
| 7     | KF280703     | 1701   |
| 8     | KF280711     | 1701   |
| 9     | KF280719     | 1701   |
| 10    | KF280727     | 1701   |
| 11    | KF280735     | 1701   |
| 12    | KF280743     | 1701   |
| 13    | KF280751     | 1701   |
| 14    | JQ319658     | 1701   |
| 15    | JQ319657     | 1701   |
| 16    | HM204579     | 1770   |
| 17    | HM204578     | 1743   |
| 18    | HM204577     | 1743   |
| 19    | HM204576     | 1707   |
| 20    | HM204575     | 1770   |
| 21    | HM204574     | 1707   |
| 22    | HM204573     | 1707   |
| 23    | HM204572     | 1743   |
| 24    | HM204571     | 1707   |
| 25    | HM204570     | 1710   |
| 26    | HM204569     | 1707   |
| 27    | HM204568     | 1755   |
| 28    | HM204567     | 1707   |
| 29    | HM204566     | 1767   |
| 30    | JN600356     | 1701   |
| 31    | JF293316     | 1701   |
| 32    | JF293315     | 1701   |
